# Supplementary material for: A protein complex containing Epo1p anchors the cortical endoplasmic reticulum to the yeast bud tip
Source: PubMed Central journal article supplement — J Cell Biol. 2015 Jan 5;208(1):71–87. doi: 10.1083/jcb.201407126 (PMC4284228; doi:10.1083/jcb.201407126), 2015-01-05
Supplement: supp_jcb.201407126_JCB_201407126_sm.pdf [file supp_jcb.201407126_JCB_201407126_sm.pdf]

Neller et al., <http://www.jcb.org/cgi/content/full/jcb.201407126/DC1>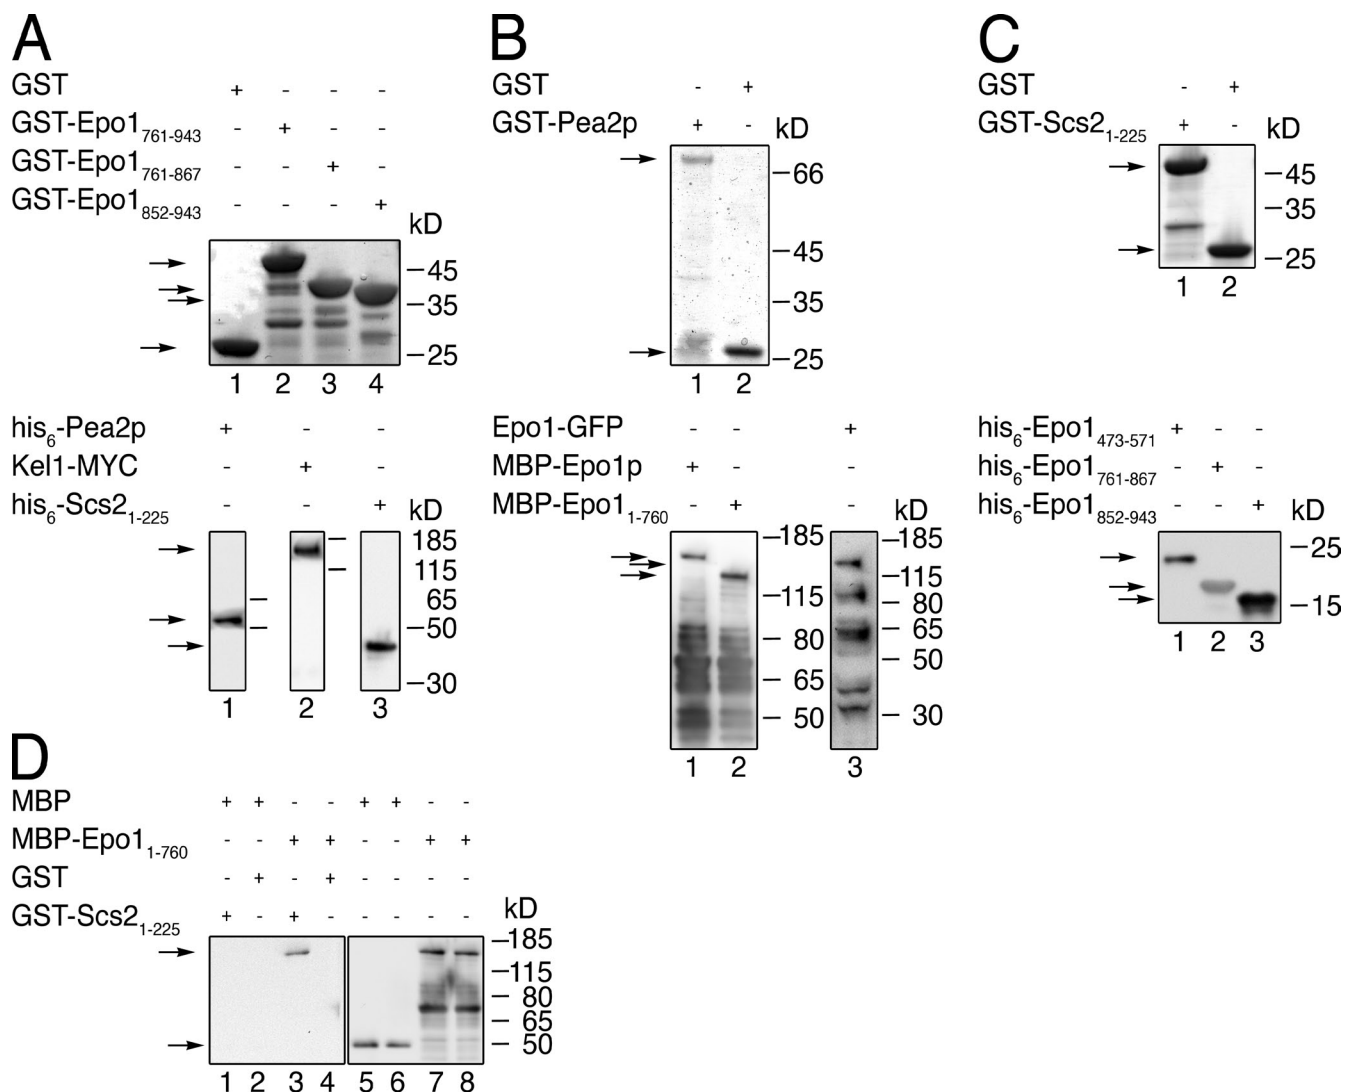

Figure S1. **Expression of fusion proteins used for pull-down analysis.** (A, top) SDS-PAGE of glutathione eluates of glutathione-coupled Sepharose beads incubated with extracts of bacterial cells expressing GST (lane 1), GST-Epo1<sub>761-943</sub> (lane 2), GST-Epo1<sub>761-867</sub> (lane 3), or GST-Epo1<sub>852-943</sub> (lane 4). The proteins were stained with Coomassie. (bottom) SDS-PAGE of yeast (lane 2) or *E. coli* extracts (lanes 1 and 3) containing his<sub>6</sub>-Pea2p (lane 1), Kel1-MYC (lane 2), or his<sub>6</sub>-Scs2<sub>1-225</sub> (lane 3). After transfer, the fusion proteins were detected by Western blotting using anti-His (lanes 1 and 3) or anti-MYC (lane 2) antibodies. (B, top) As in A (top), but with extracts from *E. coli* expressing GST-Pea2p (lane 1) or GST (lane 2). (bottom) SDS-PAGE of *E. coli* (lanes 1 and 2) or yeast extracts (lane 3) containing MBP-Epo1p (lane 1), MBP-Epo1<sub>1-760</sub> (lane 2), or Epo1-GFP (lane 3). After transfer, the fusion proteins were detected by Western blotting using anti-MBP (lanes 1 and 2) or anti-GFP (lane 3) antibodies. (C, top) As in A (top), but with extracts from *E. coli* expressing GST-Scs2<sub>1-225</sub> (lane 1) or GST (lane 2). (bottom) SDS-PAGE of *E. coli* extracts containing his<sub>6</sub>-Epo1<sub>473-571</sub> (lane 1), his<sub>6</sub>-Epo1<sub>761-867</sub> (lane 2), or his<sub>6</sub>-Epo1<sub>852-943</sub> (lane 3). After transfer, the fusion proteins were detected by Western blotting using anti-His antibodies. (D) Eluates of Sepharose bead-coupled GST-Scs2<sub>1-225</sub> (lanes 1 and 3) or GST (lanes 2 and 4) incubated with *E. coli* extracts containing MBP (lanes 1, 2, 5, and 6) or MBP-Epo1<sub>1-760</sub> (3, 4, 7, and 8) were separated by SDS-PAGE. Western blots were probed with anti-MBP antibodies. Lanes 5–8 show the unbound fractions of the extracts. The arrows indicate the running positions of the fusion proteins on the gel.

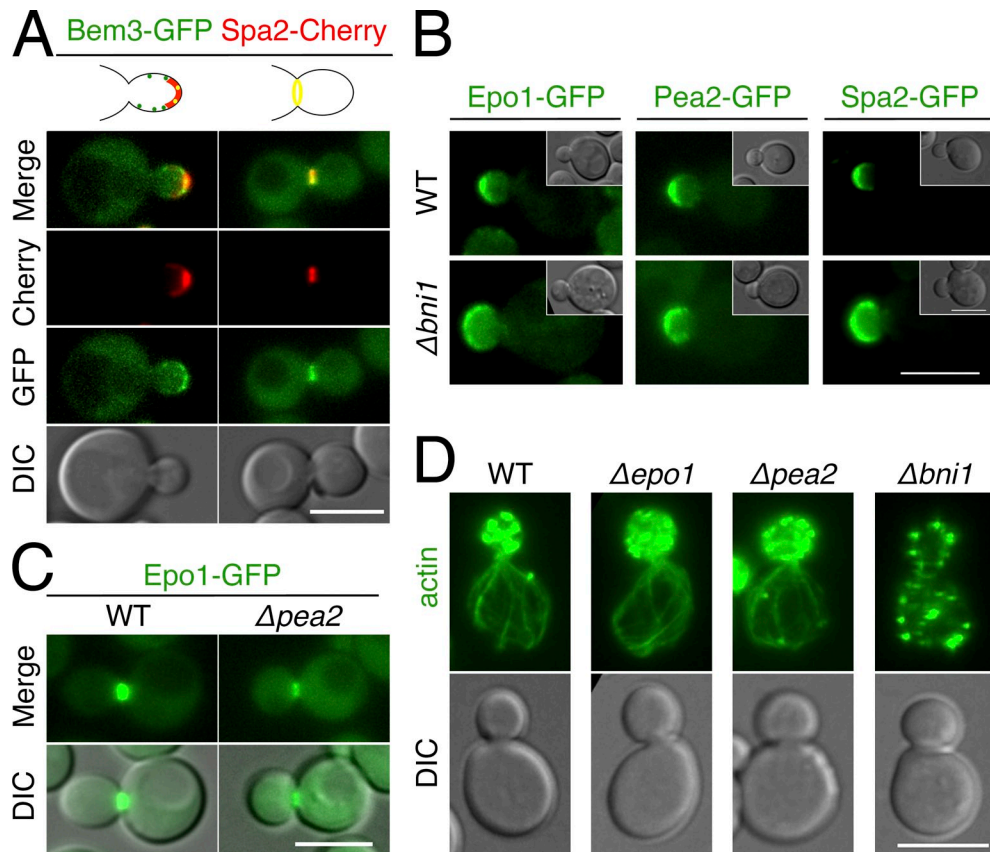

Figure S2. **Localizations of Bem3-GFP in WT cells and of Epo1-, Pea2-, and Spa2-GFP in  $\Delta bni1$  or  $\Delta pea2$  cells and the actin staining of WT and of  $\Delta epo1$  cells.** (A) Bud tip and neck staining of Bem3-GFP. Two-channel microscopy of cells coexpressing Bem3-GFP and Spa2-Cherry. Shown is one representative cell during tip growth or mitosis. (B) Epo1-, Pea2-, and Spa2-GFP lose their focused distribution upon deletion of *BNI1*. Shown are the GFP images of one representative cell each during tip growth in WT (top) or  $\Delta bni1$  cells (bottom). Insets show a reduction of the DIC image of the same cell. (C) Representative images of WT and  $\Delta pea2$  cells displaying Epo1-GFP at the bud neck. (D) Alexa Fluor 488 Phalloidin staining of WT cells and cells lacking *EPO1*, *PEA2*, or *BNI1*. Note the WT-like actin cytoskeleton in  $\Delta pea2$  and  $\Delta epo1$  cells as compared with  $\Delta bni1$  cells. Bars, 5  $\mu$ m.

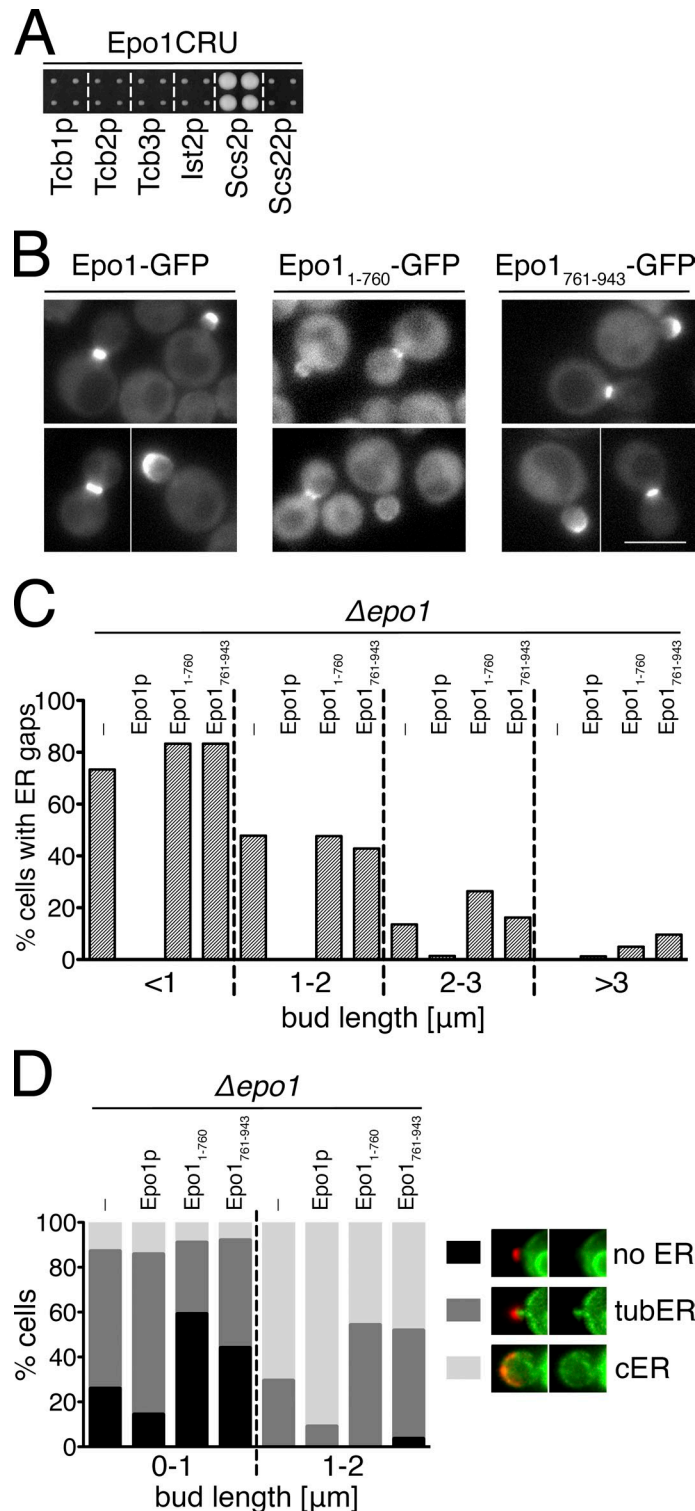

Figure S3. **Array-based Split-Ub interaction assay between Epo1CRU and the  $N_{ub}$  fusions of all ER-PM tethers and the complementation of  $\Delta$ epo1 cells by the expression of Epo1p fragments.** (A) Epo1p interacts exclusively with the ER-PM tether protein Scs2p. Split-Ub interaction assay of six yeast strains each coexpressing Epo1CRU with either  $N_{ub}$ -fused Tcb1p, Tcb2p, Tcb3p, Ist2p, Scs2p, or Scs22p. Shown are quadruplets of each strain after 4 d of growth on medium containing 5-FOA. Dashed lines separate the yeast strains expressing the different  $N_{ub}$  fusion proteins. (B) The isolated Scs2p binding sites on Epo1p do not complement the loss of *EPO1*. Fluorescence images of cells expressing Epo1-GFP (left) or Epo1<sub>1-760</sub>-GFP (middle), both from the native promoter, or Epo1<sub>761-943</sub>-GFP (right) expressed from the *P<sub>MET17</sub>* promoter. Bar, 5  $\mu$ m. (C)  $\Delta$ epo1 cells expressing GFP-Sec2p and an empty plasmid (–) or a plasmid carrying the Cherry fusion to Epo1p, Epo1<sub>1-760</sub>, or Epo1<sub>761-943</sub> were quantified for gaps of ER staining at the bud tip as in Fig. 7 B (42 < *n* < 300). (D)  $\Delta$ epo1 cells expressing GFP-Sec2p and an empty plasmid (–) or a plasmid carrying the Cherry-fusion to Epo1p, Epo1<sub>1-760</sub>, or Epo1<sub>761-943</sub> were scored for the three stages of cER inheritance (no, tubular [tubER], or cER). The same representative images were shown previously in Fig. 7 C. Quantification was as described in Fig. 7 C (105 < *n* < 225).

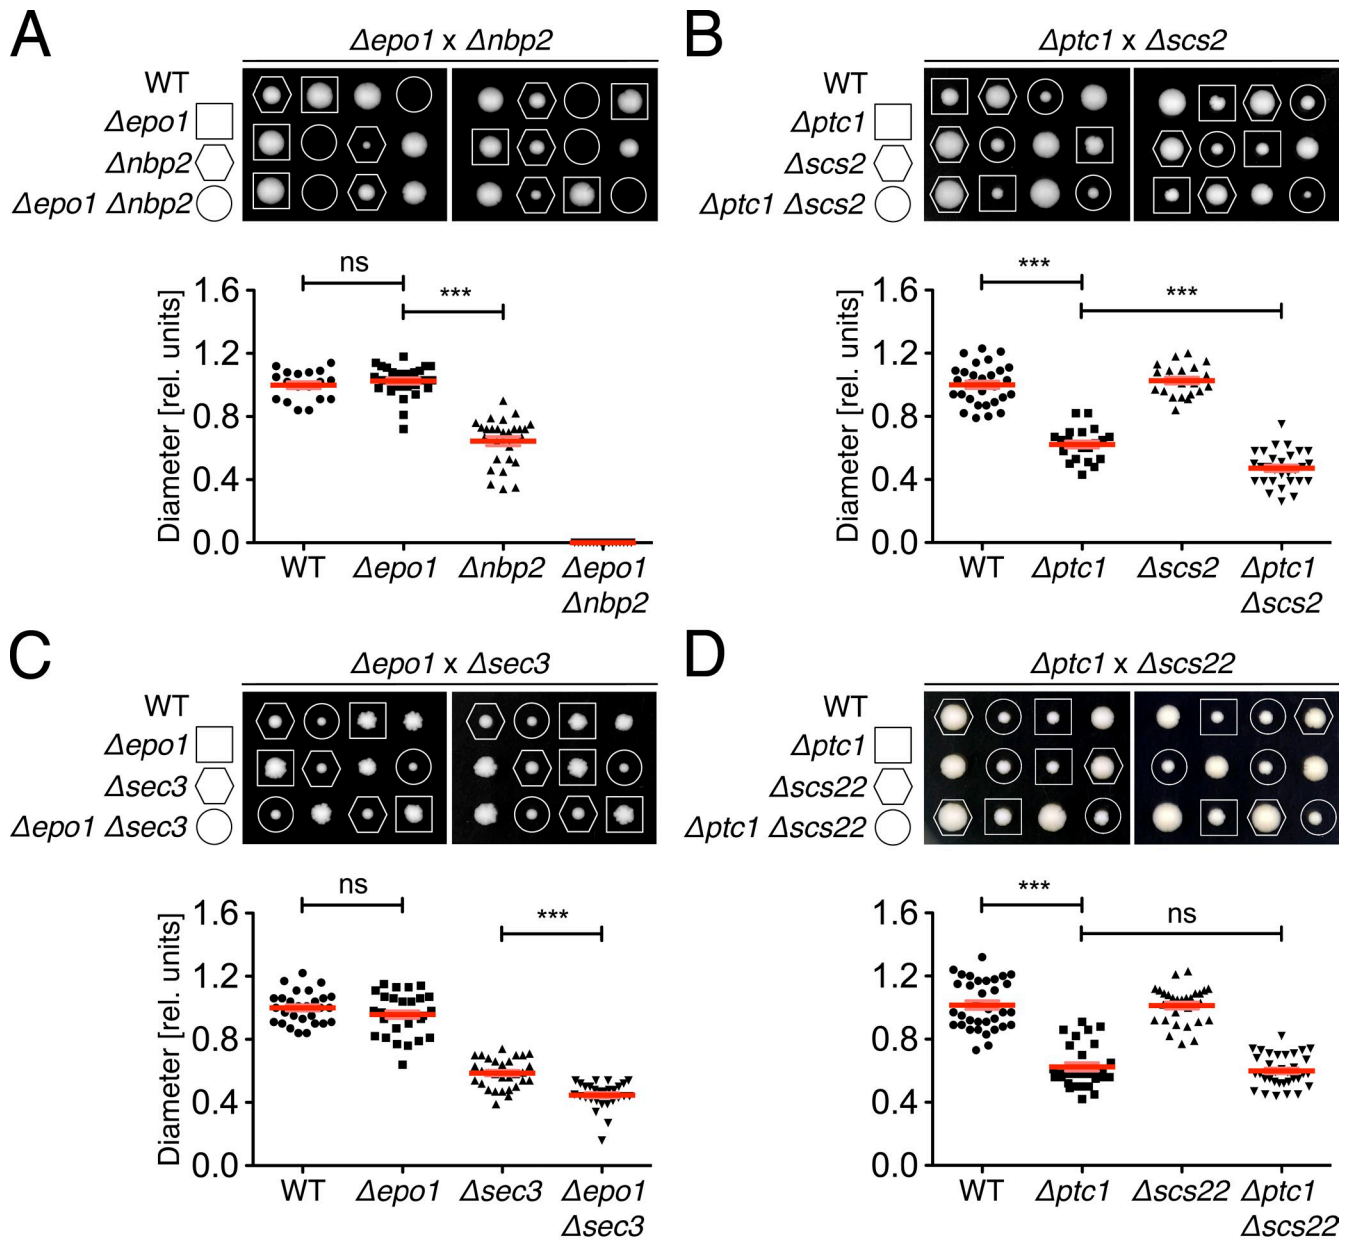

Figure S4. **Tetrad analyses of heterozygous double-deletion strains after sporulation.** (A, top) Tetrad analysis of the meiotic progeny derived from diploid cells heterozygous for  $\Delta epo1$  and  $\Delta nbp2$ . (bottom) Quantification of the diameters of the spores ( $17 < n < 31$ ; error bars show SEM). \*\*\*,  $P < 0.001$ . (B) As in A, but with  $\Delta ptc1/PTC1$ ;  $\Delta scs2/SCS2$  cells. (C) As in A, but with  $\Delta epo1/EPO1$ ;  $\Delta sec3/SEC3$  cells. (D) As in A, but with  $\Delta ptc1/PTC1$ ;  $\Delta scs22/SCS22$  cells. Spores in A, B, and D were grown at 30°C for 4 d and, in C, at 23°C for 6 d. rel., relative.

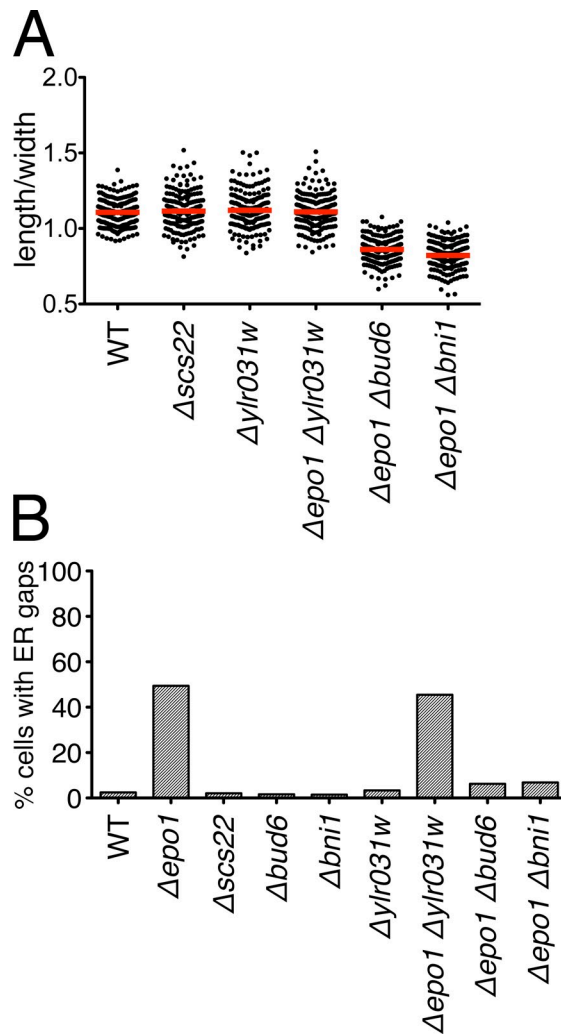

Figure S5. **Quantification of length/width ratios and ER gaps.** Quantification of length/width ratios ( $200 < n < 206$ , error bars show SEM; the value for the WT is taken from Fig. 3 D) and ER gaps ( $80 < n < 139$ ) of different yeast deletion strains. Analysis was performed as in Fig. 8 (A and B).

Table S1. List of all tested N<sub>ub</sub> fusions

|                             |                         |                        |                       |          |                       |                       |
|-----------------------------|-------------------------|------------------------|-----------------------|----------|-----------------------|-----------------------|
| ABP1                        | BUD20                   | EDE1                   | KEL1                  | PAN1     | SEC4                  | STE11                 |
| ACF2                        | CAP1                    | ELG1                   | KEL2                  | PBS2     | SEC5                  | STE20                 |
| ACT1(P)                     | CBK1                    | ELM1                   | KIC1                  | PDE1     | SEC6                  | STE50                 |
| ACT1 <sup>V152G;T318I</sup> | CDC3                    | ELO1                   | KIN1                  | PDS1     | SEC8                  | STT4                  |
| AFR1                        | CDC5                    | END3                   | KIN2                  | PEA2     | SEC9                  | STU1                  |
| AIP1                        | CDC6                    | ENT2                   | KIN4                  | PEX4(P)  | SEC10                 | STU2                  |
| AIR1                        | CDC10                   | EPO1                   | KIP2                  | PEX19(P) | SEC14                 | SVL3                  |
| AMN1                        | CDC11                   | ESP1                   | KIP3                  | PFK1     | SEC15                 | SWE1                  |
| APC2                        | CDC12                   | EXO70                  | KOG1                  | PFY1     | SEC62(P)              | SWI4                  |
| APG17                       | CDC14                   | EXO84                  | KSS1                  | PHO85    | SFH1                  | SWI6                  |
| APP1                        | CDC20                   | FAB1                   | LAC1                  | PIK1     | SFH2                  | SYP1                  |
| ARC1                        | CDC24                   | FAR1                   | LAG1                  | PIL1     | SFH3                  | TAO3                  |
| ARC40                       | CDC25                   | FKH1                   | LAS17                 | PKC1     | SFH4                  | TCB1                  |
| ARP1                        | CDC28                   | FKH2                   | LCB4                  | PKH1     | SFH5                  | TCB2                  |
| ARP6                        | CDC37                   | FKS1                   | LCB5                  | PKH2     | SFK1                  | TCB3                  |
| ASE1                        | CDC42(P)                | FKS2                   | LDB17                 | PKH3     | SHE4                  | TCO89                 |
| ASK10                       | CHK1                    | FUS2                   | LRE1                  | PLC1     | SHO1(P)               | TDH1                  |
| AUR1                        | CHS1                    | FUS3                   | LRG1                  | PNC1     | SHO1 <sup>Cterm</sup> | TEF1                  |
| AVO1                        | CHS2                    | GIC1                   | LSP1                  | PPH3     | SHS1                  | TEL1                  |
| AVO2(P)                     | CHS3                    | GIM4                   | LST8                  | PRK1     | SIT4                  | TEM1(P)               |
| AXL2 <sup>Cterm</sup>       | CIK1                    | GIN4                   | LTE1                  | PSY4     | SIZ1                  | TLG2(P)               |
| BBC1                        | CIN1                    | GLG1                   | MAD2                  | PTC1     | SKG6                  | TOK1                  |
| BCK1                        | CIN8                    | GPA2                   | MAD3                  | PTC2     | SKM1                  | TOR1                  |
| BCK2                        | CLA4                    | GPB1                   | MCD1                  | PUF3     | SKN7                  | TOR2                  |
| BCY1                        | CLB1                    | GPB2                   | MCK1                  | RAD9     | SKO1                  | TOS2                  |
| BEM1                        | CLB2                    | GSY1                   | MEC1                  | RAS1     | SKT5                  | TPK1                  |
| BEM2                        | CLB3                    | GUK1(P)                | MID2 <sup>Cterm</sup> | RAS2     | SLA1                  | TPM1                  |
| BEM3                        | CLB4                    | GUS1                   | MKK1                  | RAX1     | SLA2                  | TPM2                  |
| BEM4                        | CLN1                    | HCM1                   | MLC1(P)               | RGA2     | SLI15                 | TSC11                 |
| BFA1                        | CLN2                    | HLR1                   | MLC2                  | RGD1     | SLM1                  | TSC13                 |
| BIK1                        | CLN3                    | HOF1                   | MOB1                  | RGS2     | SIT2                  | TUS1                  |
| BIM1                        | CMD1                    | HOF1 <sup>98-699</sup> | MPS1                  | RHO1     | SMC1                  | UBC6(P)               |
| BIR1                        | CMK1                    | HOG1                   | MSB1                  | RHO2     | SMI1                  | UBC9                  |
| BIT61                       | CMP2                    | HOT1                   | MSB3                  | RHO4     | SMP1                  | UBP7                  |
| BMH1                        | CNA1                    | HSK3                   | MSB4                  | RHO5     | SMT3(P)               | VAC8                  |
| BMH2                        | CNB1                    | HSL1                   | MSN1                  | RIM21    | SMY1                  | VAC17                 |
| BNI1                        | CPR6                    | HSL7                   | MSN2                  | RLM1     | SNC1(P)               | VHS1                  |
| BNI1 <sup>Cterm</sup>       | CRN1                    | HSP82                  | MSN4                  | ROM1     | SOG2                  | VHS2                  |
| BNI4                        | CRZ1                    | HUA1                   | MSO1                  | ROM2     | SPA2                  | VMA13                 |
| BNI5                        | CSE4                    | HYM1                   | MSS4                  | RSR1     | SPC110                | VRP1                  |
| BNR1                        | CYK3                    | IME2                   | MYO1                  | RVS161   | SPC19                 | WSC1 <sup>Cterm</sup> |
| BNR1 <sup>Cterm</sup>       | CYK3 <sup>69-885</sup>  | INN1                   | MYO2                  | RVS167   | SPC24                 | YBR053C               |
| BOI1                        | CYK3 <sup>196-885</sup> | INP51                  | MYO5                  | SAC1     | SPC34                 | YBR238C               |
| BOI1 <sup>1-95</sup> (P)    | CYR1                    | INP52                  | NAP1                  | SAC6     | SPC72                 | YDL173W               |
| BOI1 <sup>758-980</sup> (P) | DAD1                    | IPL1                   | NAS2                  | SAC7     | SPH1                  | YDL203C               |
| BOI2                        | DAD2                    | IPP1                   | NBA1                  | SAK1     | SPR28                 | YDR348C               |
| BUB2                        | DAD3                    | IQG1                   | NBP2                  | SCC2     | SPT5                  | YEL023C               |
| BUB3                        | DAM1                    | IQG1 <sup>Cterm</sup>  | NET1                  | SCC4     | SRO7                  | YGR058W               |
| BUD2                        | DBF2                    | IRA1                   | NHA1                  | SCP1     | SRO77                 | YKL161C               |
| BUD3                        | DBF20                   | IRA2                   | NIP100                | SCP160   | SRV2                  | YOR304C-A             |
| BUD4                        | DOP1                    | IRR1                   | NIS1                  | SCS2     | SSD1                  | YPD1                  |
| BUD5                        | DSE1                    | IRS4                   | NUM1                  | SCS22    | SSK1                  | YPK1                  |
| BUD6                        | DUN1                    | IST2                   | ORC6                  | SDP1     | SSK2                  | ZDS1                  |
| BUD8                        | DUO1                    | KAR3                   | PAC1                  | SEC1     | SSO1                  | ZDS2                  |
| BUD9                        | DYN1                    | KAR9                   | PAC10                 | SEC2     | STE5                  | ZEO1                  |
| BUD14                       | ECM25                   | KCC4                   | PAM1                  | SEC3     | STE7                  |                       |

(P), plasmid encoded; Cterm, N<sub>ub</sub> fused to the C terminus of the protein.

Table S2. Identities and positions of the  $N_{ub}$  fusions on the  $N_{ub}$  array shown in Fig. 1 A

|      |      |      |      |      |      |      |      |      |      |       |       |      |       |       |       |      |      |      |       |      |      |         |            |
|------|------|------|------|------|------|------|------|------|------|-------|-------|------|-------|-------|-------|------|------|------|-------|------|------|---------|------------|
| Aip1 | Bem1 | Bem2 | Bem3 | Bem4 | Boi1 | Boi2 | Scs2 | Scs2 | Bud6 | Bud14 | Cdc42 | Ist2 | Exo70 | Exo84 | Hof1  | Kel1 | Kel2 | Kin1 | Kin2  | Mso1 | Tcb1 | Nbp2    | Pec2       |
| Ptc1 | Rga2 | Rgd1 | Rho1 | Rho4 | Sac6 | Sec1 | Sec2 | Sec3 | Sec4 | Sec5  | Sec6  | Sec8 | Sec9  | Sec10 | Sec15 | Snc1 | Spa2 | Sro7 | Sro77 | Sso1 | Epo1 | Yor304c | $N_{ub}^-$ |

Table S3. List of constructs used and created in this study

| Name                                                             | Description                                                                                  | Origin                    |
|------------------------------------------------------------------|----------------------------------------------------------------------------------------------|---------------------------|
| Epo1-CRU pRS303                                                  | <i>EPO1-C<sub>ub</sub>-R-URA3, Amp<sup>R</sup>, HIS3</i>                                     | This work                 |
| Pea2-CRU pRS303                                                  | <i>PEA2-C<sub>ub</sub>-R-URA3, Amp<sup>R</sup>, HIS3</i>                                     | This work                 |
| Istf2-CRU pRS303                                                 | <i>IST2-C<sub>ub</sub>-R-URA3, Amp<sup>R</sup>, HIS3</i>                                     | This work                 |
| Tcb1-CRU pRS303                                                  | <i>TCB1-C<sub>ub</sub>-R-URA3, Amp<sup>R</sup>, HIS3</i>                                     | This work                 |
| Tcb2-CRU pRS303                                                  | <i>TCB2-C<sub>ub</sub>-R-URA3, Amp<sup>R</sup>, HIS3</i>                                     | This work                 |
| Tcb3-CRU pRS303                                                  | <i>TCB3-C<sub>ub</sub>-R-URA3, Amp<sup>R</sup>, HIS3</i>                                     | This work                 |
| <i>P<sub>MET17</sub>-Kel1-CRU pRS313</i>                         | <i>P<sub>MET17</sub>-KEL1-C<sub>ub</sub>-R-URA3, Amp<sup>R</sup>, HIS3</i>                   | This work                 |
| <i>P<sub>MET17</sub>-Epo1-CRU pRS313</i>                         | <i>P<sub>MET17</sub>-EPO1-C<sub>ub</sub>-R-URA3, Amp<sup>R</sup>, HIS3</i>                   | This work                 |
| <i>P<sub>MET17</sub>-Epo1<sub>761-943</sub>-CRU pRS313</i>       | <i>P<sub>MET17</sub>-EPO1<sub>761-943</sub>-C<sub>ub</sub>-R-URA3, Amp<sup>R</sup>, HIS3</i> | This work                 |
| <i>Epo1<sub>1-760</sub>-CRU pRS303</i>                           | <i>EPO1<sub>1-760</sub>-C<sub>ub</sub>-R-URA3, Amp<sup>R</sup>, HIS3</i>                     | This work                 |
| <i>P<sub>MET17</sub>-Epo1<sub>1-876</sub>-CRU pRS313</i>         | <i>P<sub>MET17</sub>-EPO1<sub>1-876</sub>-C<sub>ub</sub>-R-URA3, Amp<sup>R</sup>, HIS3</i>   | This work                 |
| <i>P<sub>CUP1</sub>-Nub-HA kanMX4</i>                            | <i>P<sub>CUP1</sub>-Nub-HA, Amp<sup>R</sup>, kanMX4</i>                                      | Dünkler et al., 2012      |
| <i>P<sub>CUP1</sub>-Nub-HA-kanMX4 CEN</i>                        | <i>P<sub>CUP1</sub>-Nub-HA kanMX4 CEN, Amp<sup>R</sup></i>                                   | Dünkler et al., 2012      |
| <i>P<sub>CUP1</sub>-Nub-HA-Guk1 kanMX4 CEN</i>                   | <i>P<sub>CUP1</sub>-Nub-HA-GUK1 kanMX4 CEN, Amp<sup>R</sup></i>                              | This work                 |
| <i>P<sub>CUP1</sub>-Nub-HA-Bem3<sub>1-633</sub> kanMX4 CEN</i>   | <i>P<sub>CUP1</sub>-Nub-HA-BEM3<sub>1-633</sub> kanMX4 CEN, Amp<sup>R</sup></i>              | This work                 |
| <i>P<sub>CUP1</sub>-Nub-HA-Bem3<sub>1-300</sub> kanMX4 CEN</i>   | <i>P<sub>CUP1</sub>-Nub-HA-BEM3<sub>1-300</sub> kanMX4 CEN, Amp<sup>R</sup></i>              | This work                 |
| <i>P<sub>CUP1</sub>-Nub-HA-Bem3<sub>1-100</sub> kanMX4 CEN</i>   | <i>P<sub>CUP1</sub>-Nub-HA-BEM3<sub>1-100</sub> kanMX4 CEN, Amp<sup>R</sup></i>              | This work                 |
| <i>P<sub>CUP1</sub>-Nub-HA-Bem3<sub>300-633</sub> kanMX4 CEN</i> | <i>P<sub>CUP1</sub>-Nub-HA-BEM3<sub>300-633</sub> kanMX4 CEN, Amp<sup>R</sup></i>            | This work                 |
| <i>P<sub>CUP1</sub>-Nub-HA-Scs2<sub>1-225</sub> kanMX4 CEN</i>   | <i>P<sub>CUP1</sub>-Nub-HA-SCS2<sub>1-225</sub> kanMX4 CEN, Amp<sup>R</sup></i>              | This work                 |
| <i>Epo1-CCG pRS306</i>                                           | <i>EPO1-Cherry-C<sub>ub</sub>-R-GFP, Amp<sup>R</sup>, URA3</i>                               | This work                 |
| <i>Bem3-GFP pRS304</i>                                           | <i>BEM3-GFP, Amp<sup>R</sup>, TRP1</i>                                                       | This work                 |
| <i>Pea2-GFP pRS304</i>                                           | <i>PEA2-GFP, Amp<sup>R</sup>, TRP1</i>                                                       | This work                 |
| <i>Spa2-GFP pRS304</i>                                           | <i>SPA2-GFP, Amp<sup>R</sup>, TRP1</i>                                                       | This work                 |
| <i>Epo1-GFP pRS304</i>                                           | <i>EPO1-GFP, Amp<sup>R</sup>, TRP1</i>                                                       | This work                 |
| <i>pRH475</i>                                                    | <i>HMG1-GFP, Amp<sup>R</sup>, URA3</i>                                                       | Wilhovskiy et al., 2000   |
| <i>P<sub>MET17</sub>-GFP-Sec62 pRS313</i>                        | <i>P<sub>MET17</sub>-GFP-SEC62, Amp<sup>R</sup>, HIS3</i>                                    | This work                 |
| <i>P<sub>MET17</sub>-GFP-Scs2<sub>1-225</sub> pRS313</i>         | <i>P<sub>MET17</sub>-GFP-SCS2<sub>1-225</sub>, Amp<sup>R</sup>, HIS3</i>                     | This work                 |
| <i>P<sub>MET17</sub>-Epo1<sub>1-760</sub>-GFP pRS304</i>         | <i>P<sub>MET17</sub>-EPO1<sub>1-760</sub>-GFP, Amp<sup>R</sup>, TRP1</i>                     | This work                 |
| <i>P<sub>MET17</sub>-Epo1<sub>761-943</sub>-GFP pRS313</i>       | <i>P<sub>MET17</sub>-EPO1<sub>761-943</sub>-GFP, Amp<sup>R</sup>, HIS3</i>                   | This work                 |
| <i>Spa2-Cherry pRS305</i>                                        | <i>SPA2-Cherry, Amp<sup>R</sup>, LEU2</i>                                                    | This work                 |
| <i>Spa2-Cherry pRS306</i>                                        | <i>SPA2-Cherry, Amp<sup>R</sup>, URA3</i>                                                    | This work                 |
| <i>Kel1-Cherry pRS305</i>                                        | <i>KEL1-Cherry, Amp<sup>R</sup>, LEU2</i>                                                    | This work                 |
| <i>Shs1-Cherry pRS306</i>                                        | <i>SHS1-Cherry, Amp<sup>R</sup>, URA3</i>                                                    | Schneider et al., 2013    |
| <i>P<sub>MET17</sub>-Cherry pRS315</i>                           | <i>P<sub>MET17</sub>-Cherry, Amp<sup>R</sup>, LEU2</i>                                       | This work                 |
| <i>P<sub>MET17</sub>-Hhf2-Cherry pRS315</i>                      | <i>P<sub>MET17</sub>-HHF2-Cherry, Amp<sup>R</sup>, LEU2</i>                                  | This work                 |
| <i>P<sub>MET17</sub>-Epo1-Cherry pRS315</i>                      | <i>P<sub>MET17</sub>-EPO1-Cherry, Amp<sup>R</sup>, LEU2</i>                                  | This work                 |
| <i>P<sub>MET17</sub>-Epo1<sub>1-760</sub>-Cherry pRS315</i>      | <i>P<sub>MET17</sub>-EPO1<sub>1-760</sub>-Cherry, Amp<sup>R</sup>, LEU2</i>                  | This work                 |
| <i>P<sub>MET17</sub>-Epo1<sub>761-943</sub>-Cherry pRS315</i>    | <i>P<sub>MET17</sub>-EPO1<sub>761-943</sub>-Cherry, Amp<sup>R</sup>, LEU2</i>                | This work                 |
| <i>Kel1-9xMyc pRS304</i>                                         | <i>KEL1-9xMYC, Amp<sup>R</sup>, TRP1</i>                                                     | This work                 |
| <i>pGEX-2T</i>                                                   | <i>P<sub>10c</sub>-GST, Amp<sup>R</sup></i>                                                  | GE Healthcare             |
| <i>Pea2 pGEX-2T</i>                                              | <i>P<sub>10c</sub>-GST-PEA2, Amp<sup>R</sup></i>                                             | This work                 |
| <i>Epo1<sub>761-943</sub> pGEX-2T</i>                            | <i>P<sub>10c</sub>-GST-EPO1<sub>761-943</sub>, Amp<sup>R</sup></i>                           | This work                 |
| <i>Epo1<sub>761-867</sub> pGEX-2T</i>                            | <i>P<sub>10c</sub>-GST-EPO1<sub>761-867</sub>, Amp<sup>R</sup></i>                           | This work                 |
| <i>Epo1<sub>852-943</sub> pGEX-2T</i>                            | <i>P<sub>10c</sub>-GST-EPO1<sub>852-943</sub>, Amp<sup>R</sup></i>                           | This work                 |
| <i>Scs2<sub>1-225</sub> pGEX-2T</i>                              | <i>P<sub>10c</sub>-GST-SCS2<sub>1-225</sub>, Amp<sup>R</sup></i>                             | This work                 |
| <i>Bem3<sub>1-100</sub> pGEX-2T</i>                              | <i>P<sub>10c</sub>-GST-BEM3<sub>1-100</sub>, Amp<sup>R</sup></i>                             | This work                 |
| <i>pAC</i>                                                       | <i>P<sub>17</sub>-6HIS, kanMX<sup>R</sup></i>                                                | Iffland et al., 2000      |
| <i>Pea2 pAC</i>                                                  | <i>P<sub>17</sub>-6HIS-PEA2, kanMX<sup>R</sup></i>                                           | This work                 |
| <i>Epo1<sub>473-571</sub> pAC</i>                                | <i>P<sub>17</sub>-6HIS-EPO1<sub>473-571</sub>, kanMX<sup>R</sup></i>                         | This work                 |
| <i>Epo1<sub>761-867</sub> pAC</i>                                | <i>P<sub>17</sub>-6HIS-EPO1<sub>761-867</sub>, kanMX<sup>R</sup></i>                         | This work                 |
| <i>Epo1<sub>852-943</sub> pAC</i>                                | <i>P<sub>17</sub>-6HIS-EPO1<sub>852-943</sub>, kanMX<sup>R</sup></i>                         | This work                 |
| <i>Scs2<sub>1-225</sub> pAC</i>                                  | <i>P<sub>17</sub>-6HIS-SCS2<sub>1-225</sub>, kanMX<sup>R</sup></i>                           | This work                 |
| <i>pAGT-Xpress</i>                                               | <i>P<sub>17</sub>-6HIS-AGT, Amp<sup>R</sup></i>                                              | This work                 |
| <i>Spa2<sub>1-488</sub> pAGT-Xpress</i>                          | <i>P<sub>17</sub>-6HIS-Spa2<sub>1-488</sub>-AGT, kanMX<sup>R</sup></i>                       | This work                 |
| <i>Spa2<sub>1-535</sub> pAGT-Xpress</i>                          | <i>P<sub>17</sub>-6HIS-Spa2<sub>1-535</sub>-AGT, kanMX<sup>R</sup></i>                       | This work                 |
| <i>pMal-c5x</i>                                                  | <i>P<sub>10c</sub>-MBP, Amp<sup>R</sup></i>                                                  | New England Biolabs, Inc. |
| <i>Epo1 pMal-c5x</i>                                             | <i>P<sub>10c</sub>-MBP-EPO1, Amp<sup>R</sup></i>                                             | This work                 |
| <i>Epo1<sub>1-760</sub> pMal-c5x</i>                             | <i>P<sub>10c</sub>-MBP-EPO1<sub>1-760</sub>, Amp<sup>R</sup></i>                             | This work                 |



Table S3. List of constructs used and created in this study (Continued)

| Name         | Description                                       | Origin              |
|--------------|---------------------------------------------------|---------------------|
| pFA6α-natNT2 | <i>P<sub>AgTEF</sub>-natNT2, Amp<sup>R</sup></i>  | Janke et al., 2004  |
| pFA6α-hphNT1 | <i>P<sub>AgTEF</sub>-hphNT1, Amp<sup>R</sup></i>  | Janke et al., 2004  |
| pFA6α-kanMX6 | <i>P<sub>AgTEF</sub>-kanMX6, Amp<sup>R</sup></i>  | Bähler et al., 1998 |
| pFA6α-CmLEU2 | <i>P<sub>CmLEU2</sub>-CmLEU2, Amp<sup>R</sup></i> | Schaub et al., 2006 |

Table S4. List of yeast strains used and created in this study

| Strain   | Name                                             | Relevant genotype                                                                                                                                                                                                                                                                       | Origin              |
|----------|--------------------------------------------------|-----------------------------------------------------------------------------------------------------------------------------------------------------------------------------------------------------------------------------------------------------------------------------------------|---------------------|
| JD47     | JD47                                             | MAT $\alpha$ , <i>his3-<math>\Delta</math>200</i> , <i>leu2-3</i> , 112 <i>lys2-801</i> , <i>trp1-<math>\Delta</math>63</i> , <i>ura3-52</i>                                                                                                                                            | Dohmen et al., 1995 |
| JD53     | JD53                                             | MAT $\alpha$ , <i>his3-<math>\Delta</math>200</i> , <i>leu2-3</i> , 112 <i>lys2-801</i> , <i>trp1-<math>\Delta</math>63</i> , <i>ura3-52</i>                                                                                                                                            | Dohmen et al., 1995 |
| JD51     | JD51                                             | MAT $\alpha$ / $\alpha$ , <i>his3-<math>\Delta</math>200</i> / <i>his3-<math>\Delta</math>200</i> , <i>leu2-3</i> / <i>leu2-3</i> , 112 <i>lys2-801</i> / <i>112 lys2-801</i> , <i>trp1-<math>\Delta</math>63</i> / <i>trp1-<math>\Delta</math>63</i> , <i>ura3-52</i> / <i>ura3-52</i> | Dohmen et al., 1995 |
| YAD1222  | $\Delta$ bni1                                    | JD47, <i>BNI1::hphNT1</i>                                                                                                                                                                                                                                                               | This work           |
| YAD1294  | $\Delta$ bud6                                    | JD47, <i>BUD6::natNT2</i>                                                                                                                                                                                                                                                               | This work           |
| YAD249   | $\Delta$ pea2                                    | JD47, <i>PEA2::hphNT1</i>                                                                                                                                                                                                                                                               | This work           |
| YAD248   | $\Delta$ spa2                                    | JD47, <i>SPA2::hphNT1</i>                                                                                                                                                                                                                                                               | This work           |
| YAD250   | $\Delta$ kel1                                    | JD47, <i>KEL1::hphNT1</i>                                                                                                                                                                                                                                                               | This work           |
| YAD251   | $\Delta$ bem3                                    | JD47, <i>BEM3::hphNT1</i>                                                                                                                                                                                                                                                               | This work           |
| YAD1384  | $\Delta$ ptc1                                    | JD53, <i>PTC1::kanMX6</i>                                                                                                                                                                                                                                                               | This work           |
| AHY140   | $\Delta$ nbp2                                    | JD47, <i>NBP2::natNT2</i>                                                                                                                                                                                                                                                               | Hruby et al., 2011  |
| YWY473   | $\Delta$ sec3                                    | JD53, <i>SEC3::hphNT1</i>                                                                                                                                                                                                                                                               | This work           |
| YAD1772  | $\Delta$ scs22                                   | JD47, <i>SCS22::hphNT1</i>                                                                                                                                                                                                                                                              | This work           |
| YAD253   | $\Delta$ ylr031w                                 | JD47, <i>YLR031W::hphNT1</i>                                                                                                                                                                                                                                                            | This work           |
| YAD398a  | $\Delta$ epo1_hph                                | JD47, <i>EPO1::hphNT1</i>                                                                                                                                                                                                                                                               | This work           |
| YAD400a  | $\Delta$ epo1_kan                                | JD53, <i>EPO1::kanMX6</i>                                                                                                                                                                                                                                                               | This work           |
| YAD399a  | $\Delta$ epo1_nat                                | JD47, <i>EPO1::natNT2</i>                                                                                                                                                                                                                                                               | This work           |
| YAD1153  | $\Delta$ scs2_hph                                | JD47, <i>SCS2::hphNT1</i>                                                                                                                                                                                                                                                               | This work           |
| YAD1385  | $\Delta$ scs2_kan                                | JD53, <i>SCS2::kanMX6</i>                                                                                                                                                                                                                                                               | This work           |
| YAD1405  | $\Delta$ epo1 $\Delta$ scs2                      | <i>EPO1::hphNT1 SCS2::kanMX6</i>                                                                                                                                                                                                                                                        | This work           |
| YAD1407  | $\Delta$ epo1 $\Delta$ ptc1                      | <i>EPO1::hphNT1 PTC1::kanMX6</i>                                                                                                                                                                                                                                                        | This work           |
| YAD1476  | $\Delta$ epo1 $\Delta$ nbp2                      | <i>EPO1::kanMX6 NBP2::natNT2</i>                                                                                                                                                                                                                                                        | This work           |
| YAD1482  | $\Delta$ epo1 $\Delta$ sec3                      | <i>EPO1::natNT2 SEC3::hphNT1</i>                                                                                                                                                                                                                                                        | This work           |
| YAD1478  | $\Delta$ scs2 $\Delta$ ptc1                      | <i>SCS2::hphNT1 PTC1::kanMX6</i>                                                                                                                                                                                                                                                        | This work           |
| YAD1801  | $\Delta$ scs22 $\Delta$ ptc1                     | <i>SCS2::hphNT1 PTC1::kanMX6</i>                                                                                                                                                                                                                                                        | This work           |
| YAD302.1 | $\Delta$ epo1 $\Delta$ pea2                      | <i>PEA2::hphNT1 EPO1::kanMX6</i>                                                                                                                                                                                                                                                        | This work           |
| YAD301.1 | $\Delta$ epo1 $\Delta$ spa2                      | <i>SPA2::hphNT1 EPO1::kanMX6</i>                                                                                                                                                                                                                                                        | This work           |
| YAD417.1 | $\Delta$ epo1 $\Delta$ bem3                      | <i>BEM3::hphNT1 EPO1::kanMX6</i>                                                                                                                                                                                                                                                        | This work           |
| YAD285   | $\Delta$ epo1 $\Delta$ ylr031w                   | <i>YLR031W::hphNT1 EPO1::kanMX6</i>                                                                                                                                                                                                                                                     | This work           |
| YAD1794  | $\Delta$ epo1 $\Delta$ bud6                      | <i>EPO1::hphNT1 BUD6::natNT2</i>                                                                                                                                                                                                                                                        | This work           |
| YAD1790  | $\Delta$ epo1 $\Delta$ bni1                      | <i>EPO1::natNT2 BNI1::hphNT1</i>                                                                                                                                                                                                                                                        | This work           |
| YAD416.1 | $\Delta$ pea2 $\Delta$ bem3                      | <i>BEM3::hphNT1 PEA2::kanMX6</i>                                                                                                                                                                                                                                                        | This work           |
| YAD213.1 | Pea2-CRU                                         | JD47, <i>PEA2::PEA2-Cub-R-URA3 HIS3</i>                                                                                                                                                                                                                                                 | This work           |
| YAD347   | Pea2-CRU $\Delta$ epo1                           | JD47, <i>PEA2::PEA2-Cub-R-URA3 HIS3 EPO1::CmLEU2</i>                                                                                                                                                                                                                                    | This work           |
| YAD346.1 | Epo1-CRU                                         | JD47, <i>EPO1::EPO1-Cub-R-URA3 HIS3</i>                                                                                                                                                                                                                                                 | This work           |
| YAD288   | P <sub>MET17</sub> -Epo1-CRU                     | JD47, <i>P<sub>MET17</sub>-EPO1-Cub-R-URA3 HIS3 pRS313</i>                                                                                                                                                                                                                              | This work           |
| YAD967   | P <sub>MET17</sub> -Epo1-CRU $\Delta$ pea2       | JD47, <i>P<sub>MET17</sub>-EPO1-Cub-R-URA3 pRS313 PEA2::CmLEU2</i>                                                                                                                                                                                                                      | This work           |
| YAD363   | P <sub>MET17</sub> -Epo1-CRU $\Delta$ spa2       | JD47, <i>P<sub>MET17</sub>-EPO1-Cub-R-URA3 pRS313 SPA2::CmLEU2</i>                                                                                                                                                                                                                      | This work           |
| YAD341   | P <sub>MET17</sub> -Epo1-CRU $\Delta$ kel1       | JD47, <i>P<sub>MET17</sub>-EPO1-Cub-R-URA3 pRS313 KEL1::hphNT1</i>                                                                                                                                                                                                                      | This work           |
| YAD410   | P <sub>MET17</sub> -Epo1-CRU $\Delta$ bem3       | JD47, <i>P<sub>MET17</sub>-EPO1-Cub-R-URA3 pRS313 BEM3::hphNT1</i>                                                                                                                                                                                                                      | This work           |
| YAD1394  | P <sub>MET17</sub> -Epo1 <sub>761-943</sub> -CRU | JD47, <i>P<sub>MET17</sub>-EPO1<sub>761-943</sub>-Cub-R-URA3 pRS313</i>                                                                                                                                                                                                                 | This work           |
| YAD233   | P <sub>MET17</sub> -Epo1 <sub>1-760</sub> -CRU   | JD47, <i>P<sub>MET17</sub>-EPO1<sub>1-760</sub>-Cub-R-URA3 pRS313</i>                                                                                                                                                                                                                   | This work           |
| YAD580   | P <sub>MET17</sub> -Epo1 <sub>1-876</sub> -CRU   | JD47, <i>P<sub>MET17</sub>-EPO1<sub>1-876</sub>-Cub-R-URA3 pRS313</i>                                                                                                                                                                                                                   | This work           |
| YAD329   | P <sub>MET17</sub> -Kel1-CRU                     | JD47, <i>P<sub>MET17</sub>-KEL1-Cub-R-URA3 HIS3 pRS313</i>                                                                                                                                                                                                                              | This work           |
| YAD1175  | Ist2-CRU                                         | JD47, <i>IST2::IST2-Cub-R-URA3 HIS3</i>                                                                                                                                                                                                                                                 | This work           |
| YAD1176  | Tcb1-CRU                                         | JD47, <i>TCB1::TCB1-Cub-R-URA3 HIS3</i>                                                                                                                                                                                                                                                 | This work           |
| YAD1177  | Tcb2-CRU                                         | JD47, <i>TCB2::TCB2-Cub-R-URA3 HIS3</i>                                                                                                                                                                                                                                                 | This work           |
| YAD1178  | Tcb3-CRU                                         | JD47, <i>TCB3::TCB3-Cub-R-URA3 HIS3</i>                                                                                                                                                                                                                                                 | This work           |
| YAD305   | N <sub>ub</sub> -Spa2 $\Delta$ pea2              | JD53, <i>P<sub>SPA2</sub>::kanMX6 P<sub>CUP1</sub>N<sub>ub</sub>-HA PEA2::CmLEU2</i>                                                                                                                                                                                                    | This work           |
| YAD307   | N <sub>ub</sub> -Kel1 $\Delta$ pea2              | JD53, <i>P<sub>KEL1</sub>::kanMX6 P<sub>CUP1</sub>N<sub>ub</sub>-HA PEA2::CmLEU2</i>                                                                                                                                                                                                    | This work           |
| YAD311   | N <sub>ub</sub> -Bem3 $\Delta$ pea2              | JD53, <i>P<sub>BEM3</sub>::kanMX6 P<sub>CUP1</sub>N<sub>ub</sub>-HA PEA2::CmLEU2</i>                                                                                                                                                                                                    | This work           |
| YAD306   | N <sub>ub</sub> $\Delta$ pea2                    | JD53, <i>P<sub>CUP1</sub>N<sub>ub</sub>-HA kanMX4-CEN PEA2::CmLEU2</i>                                                                                                                                                                                                                  | This work           |
| YAD310   | N <sub>ub</sub> -Bud6 $\Delta$ pea2              | JD53, <i>P<sub>BUD6</sub>::kanMX6 P<sub>CUP1</sub>N<sub>ub</sub>-HA PEA2::CmLEU2</i>                                                                                                                                                                                                    | This work           |
| YAD1358  | N <sub>ub</sub> -Scs2 $\Delta$ pea2              | JD53, <i>P<sub>SCS2</sub>::kanMX6 P<sub>CUP1</sub>N<sub>ub</sub>-HA PEA2::CmLEU2</i>                                                                                                                                                                                                    | This work           |
| YAD384   | N <sub>ub</sub> -Pea2 $\Delta$ spa2              | JD53, <i>P<sub>PEA2</sub>::kanMX6 P<sub>CUP1</sub>N<sub>ub</sub>-HA SPA2::natNT2</i>                                                                                                                                                                                                    | This work           |
| YAD380   | N <sub>ub</sub> -Kel1 $\Delta$ spa2              | JD53, <i>P<sub>KEL1</sub>::kanMX6 P<sub>CUP1</sub>N<sub>ub</sub>-HA SPA2::natNT2</i>                                                                                                                                                                                                    | This work           |
| YAD365   | N <sub>ub</sub> -Bem3 $\Delta$ spa2              | JD53, <i>P<sub>BEM3</sub>::kanMX6 P<sub>CUP1</sub>N<sub>ub</sub>-HA SPA2::natNT2</i>                                                                                                                                                                                                    | This work           |

Table S4. List of yeast strains used and created in this study (Continued)

| Strain  | Name                                                                                  | Relevant genotype                                                                                                          | Origin    |
|---------|---------------------------------------------------------------------------------------|----------------------------------------------------------------------------------------------------------------------------|-----------|
| YAD382  | N <sub>ub</sub> Δspa2                                                                 | JD53, P <sub>CUP1</sub> N <sub>ub</sub> -HA kanMX4-CEN SPA2::natNT2                                                        | This work |
| YAD351  | N <sub>ub</sub> -Pea2 Δkel1                                                           | JD53, P <sub>PEA2</sub> ::kanMX6 P <sub>CUP1</sub> N <sub>ub</sub> -HA KEL1::CmLEU2                                        | This work |
| YAD344  | N <sub>ub</sub> -Spa2 Δkel1                                                           | JD53, P <sub>SPA2</sub> ::kanMX6 P <sub>CUP1</sub> N <sub>ub</sub> -HA KEL1::CmLEU2                                        | This work |
| YAD352  | N <sub>ub</sub> -Bem3 Δkel1                                                           | JD53, P <sub>BEM3</sub> ::kanMX6 P <sub>CUP1</sub> N <sub>ub</sub> -HA KEL1::CmLEU2                                        | This work |
| YAD346  | N <sub>ub</sub> Δkel1                                                                 | JD53, P <sub>CUP1</sub> N <sub>ub</sub> -HA kanMX4-CEN KEL1::CmLEU2                                                        | This work |
| YAD356  | N <sub>ub</sub> -Bud6 Δkel1                                                           | JD53, P <sub>BUD6</sub> ::kanMX6 P <sub>CUP1</sub> N <sub>ub</sub> -HA KEL1::CmLEU2                                        | This work |
| YAD402  | N <sub>ub</sub> -Pea2 Δbem3                                                           | JD53, P <sub>PEA2</sub> ::kanMX6 P <sub>CUP1</sub> N <sub>ub</sub> -HA BEM3::natNT2                                        | This work |
| YAD401  | N <sub>ub</sub> -Spa2 Δbem3                                                           | JD53, P <sub>SPA2</sub> ::kanMX6 P <sub>CUP1</sub> N <sub>ub</sub> -HA BEM3::natNT2                                        | This work |
| YAD403  | N <sub>ub</sub> -Kel1 Δbem3                                                           | JD53, P <sub>KEL1</sub> ::kanMX6 P <sub>CUP1</sub> N <sub>ub</sub> -HA BEM3::natNT2                                        | This work |
| YAD408  | N <sub>ub</sub> Δbem3                                                                 | JD53, P <sub>CUP1</sub> N <sub>ub</sub> -HA kanMX4-CEN BEM3::natNT2                                                        | This work |
| YAD312  | N <sub>ub</sub> -Spa2 Δepo1                                                           | JD53, P <sub>SPA2</sub> ::kanMX6 P <sub>CUP1</sub> N <sub>ub</sub> -HA EPO1::natNT2                                        | This work |
| YAD313  | N <sub>ub</sub> -Kel1 Δepo1                                                           | JD53, P <sub>KEL1</sub> ::kanMX6 P <sub>CUP1</sub> N <sub>ub</sub> -HA EPO1::natNT2                                        | This work |
| YAD316  | N <sub>ub</sub> -Bem3 Δepo1                                                           | JD53, P <sub>BEM3</sub> ::kanMX6 P <sub>CUP1</sub> N <sub>ub</sub> -HA EPO1::natNT2                                        | This work |
| YAD315  | N <sub>ub</sub> Δepo1                                                                 | JD53, P <sub>CUP1</sub> N <sub>ub</sub> -HA kanMX4-CEN EPO1::natNT2                                                        | This work |
| YAD1446 | N <sub>ub</sub> -Scs2 Δepo1                                                           | JD53, P <sub>SCS2</sub> ::kanMX6 P <sub>CUP1</sub> N <sub>ub</sub> -HA EPO1::natNT2                                        | This work |
| YAD1111 | pN <sub>ub</sub> -Scs2 <sub>1-225</sub>                                               | JD53, P <sub>CUP1</sub> N <sub>ub</sub> -HA-SCS2 <sub>1-225</sub> kanMX4-CEN                                               | This work |
| YAD1814 | pN <sub>ub</sub> -Bem3 <sub>1-633</sub>                                               | JD53, P <sub>CUP1</sub> N <sub>ub</sub> -HA-BEM3 <sub>1-633</sub> kanMX4-CEN                                               | This work |
| YAD1815 | pN <sub>ub</sub> -Bem3 <sub>1-300</sub>                                               | JD53, P <sub>CUP1</sub> N <sub>ub</sub> -HA-BEM3 <sub>1-300</sub> kanMX4-CEN                                               | This work |
| YAD1816 | pN <sub>ub</sub> -Bem3 <sub>1-100</sub>                                               | JD53, P <sub>CUP1</sub> N <sub>ub</sub> -HA-BEM3 <sub>1-100</sub> kanMX4-CEN                                               | This work |
| YAD1817 | pN <sub>ub</sub> -Bem3 <sub>300-633</sub>                                             | JD53, P <sub>CUP1</sub> N <sub>ub</sub> -HA-BEM3 <sub>300-633</sub> kanMX4-CEN                                             | This work |
| YAD974  | P <sub>MET17</sub> -EPO1-CCG                                                          | JD47, P <sub>EPO1</sub> ::P <sub>MET17</sub> natNT2 EPO1::EPO1-Cherry-C <sub>ub</sub> -R-GFP URA3                          | This work |
| YAD225  | Epo1-GFP                                                                              | JD47, EPO1::EPO1-GFP TRP1                                                                                                  | This work |
| YAD239  | Epo1 <sub>1-760</sub> -GFP                                                            | JD47, EPO1::EPO1 <sub>1-760</sub> -GFP TRP1                                                                                | This work |
| YAD1321 | P <sub>MET17</sub> -Epo1 <sub>761-943</sub> -GFP                                      | JD47, P <sub>MET17</sub> -EPO1 <sub>761-944</sub> -GFP HIS3 pRS313                                                         | This work |
| YAD1195 | Epo1-GFP Δpea2                                                                        | JD47, EPO1::EPO1-GFP TRP1 PEA2::hphNT1                                                                                     | This work |
| YAD1223 | Epo1-GFP Δbni1                                                                        | JD47, EPO1::EPO1-GFP TRP1 BNI1::hphNT1                                                                                     | This work |
| YAD241  | Pea2-GFP                                                                              | JD47, PEA2::PEA2-GFP TRP1                                                                                                  | This work |
| YAD1288 | Pea2-GFP Δepo1                                                                        | JD47, PEA2::PEA2-GFP TRP1 EPO1::hphNT1                                                                                     | This work |
| YAD1292 | Pea2-GFP Δbni1                                                                        | JD47, PEA2::PEA2-GFP TRP1 BNI1::hphNT1                                                                                     | This work |
| YAD959  | Spa2-GFP                                                                              | JD47, SPA2::SPA2-GFP TRP1                                                                                                  | This work |
| YAD1293 | Spa2-GFP Δbni1                                                                        | JD47, SPA2::SPA2-GFP TRP1 BNI1::hphNT1                                                                                     | This work |
| YAD1112 | P <sub>MET17</sub> -GFP-Scs2 <sub>1-225</sub>                                         | JD47, P <sub>MET17</sub> -GFP-SCS2 <sub>1-225</sub> HIS3 pRS313                                                            | This work |
| YAD1137 | P <sub>MET17</sub> -GFP-Scs2 <sub>1-225</sub> Δepo1                                   | JD47, P <sub>MET17</sub> -GFP-SCS2 <sub>1-225</sub> HIS3 pRS313 EPO1::hphNT1                                               | This work |
| YAD1135 | P <sub>MET17</sub> -GFP-Scs2 <sub>1-225</sub> Δpea2                                   | JD47, P <sub>MET17</sub> -GFP-SCS2 <sub>1-225</sub> HIS3 pRS313 PEA2::hphNT1                                               | This work |
| YAD1136 | P <sub>MET17</sub> -GFP-Scs2 <sub>1-225</sub> Δspa2                                   | JD47, P <sub>MET17</sub> -GFP-SCS2 <sub>1-225</sub> HIS3 pRS313 SPA2::hphNT1                                               | This work |
| YAD1134 | P <sub>MET17</sub> -GFP-Scs2 <sub>1-225</sub> Δkel1                                   | JD47, P <sub>MET17</sub> -GFP-SCS2 <sub>1-225</sub> HIS3 pRS313 KEL1::hphNT1                                               | This work |
| YAD1133 | P <sub>MET17</sub> -GFP-Scs2 <sub>1-225</sub> Δbem3                                   | JD47, P <sub>MET17</sub> -GFP-SCS2 <sub>1-225</sub> HIS3 pRS313 BEM3::hphNT1                                               | This work |
| YAD519  | P <sub>MET17</sub> -GFP-SEC62                                                         | JD47, P <sub>MET17</sub> -GFP-SEC62 HIS3 pRS313                                                                            | This work |
| YAD520  | P <sub>MET17</sub> -GFP-SEC62 Δepo1                                                   | JD47, P <sub>MET17</sub> -GFP-SEC62 HIS3 pRS313 EPO1::hphNT1                                                               | This work |
| YAD1297 | Spa2-GFP Kel1-Cherry                                                                  | JD47, SPA2::SPA2-GFP TRP1 KEL1::KEL1-Cherry LEU2                                                                           | This work |
| YAD1309 | Spa2-GFP Kel1-Cherry                                                                  | JD53, SPA2::SPA2-GFP TRP1 KEL1::KEL1-Cherry LEU2                                                                           | This work |
| YAD816  | Epo1-GFP Kel1-Cherry                                                                  | JD47, EPO1::EPO1-GFP TRP1 KEL1::KEL1-Cherry LEU2                                                                           | This work |
| YAD1311 | Epo1-GFP Kel1-Cherry                                                                  | JD53, EPO1::EPO1-GFP TRP1 KEL1::KEL1-Cherry LEU2                                                                           | This work |
| YAD230  | Epo1-GFP Spa2-Cherry                                                                  | JD47, EPO1::EPO1-GFP TRP1 SPA2::SPA2-Cherry URA3                                                                           | This work |
| YAD1313 | Epo1-GFP Spa2-Cherry                                                                  | JD53, EPO1::EPO1-GFP TRP1 SPA2::SPA2-Cherry LEU2                                                                           | This work |
| YAD794  | Bem3-GFP Spa2-Cherry306 47                                                            | JD47, BEM3::BEM3-GFP TRP1 SPA2::SPA2-Cherry URA3                                                                           | This work |
| YAD1312 | Bem3-GFP304 Spa2-Cherry                                                               | JD53, BEM3::BEM3-GFP TRP1 SPA2::SPA2-Cherry LEU2                                                                           | This work |
| YAD1536 | Spa2-GFP Shs1-Cherry                                                                  | JD47, SPA2::SPA2-GFP TRP1 SHS1::SHS1-Cherry URA3                                                                           | This work |
| YAD1766 | Epo1-GFP Shs1-Cherry                                                                  | JD47, EPO1::EPO1-GFP TRP1 SHS1::SHS1-Cherry URA3                                                                           | This work |
| YAD966  | P <sub>MET17</sub> -Hhf2-Cherry Spa2-GFP                                              | JD47, P <sub>MET17</sub> -HHF2-Cherry LEU2 pRS315 SPA2::SPA2-GFP TRP1                                                      | This work |
| YAD1199 | P <sub>MET17</sub> -GFP-SEC62 Spa2-Cherry                                             | JD47, P <sub>MET17</sub> -GFP-SEC62 HIS3 pRS313 SPA2::SPA2-Cherry LEU2                                                     | This work |
| YAD1200 | P <sub>MET17</sub> -GFP-SEC62 Spa2-Cherry                                             | JD47, P <sub>MET17</sub> -GFP-SEC62 HIS3 pRS313 SPA2::SPA2-Cherry LEU2                                                     | This work |
|         | Δepo1                                                                                 | EPO1::hphNT1                                                                                                               |           |
| YAD1457 | P <sub>MET17</sub> -Cherry P <sub>MET17</sub> -GFP-SEC62 Δepo1                        | JD47, P <sub>MET17</sub> -Cherry LEU2 pRS315 P <sub>MET17</sub> -GFP-SEC62 HIS3 pRS313 EPO1::hphNT1                        | This work |
| YAD1323 | P <sub>MET17</sub> -Epo1-Cherry P <sub>MET17</sub> -GFP-SEC62 Δepo1                   | JD47, P <sub>MET17</sub> -EPO1-Cherry LEU2 pRS315 P <sub>MET17</sub> -GFP-SEC62 HIS3 pRS313 EPO1::hphNT1                   | This work |
| YAD1324 | P <sub>MET17</sub> -Epo1 <sub>1-760</sub> -Cherry P <sub>MET17</sub> -GFP-SEC62 Δepo1 | JD47, P <sub>MET17</sub> -EPO1 <sub>1-760</sub> -Cherry LEU2 pRS315 P <sub>MET17</sub> -GFP-SEC62 HIS3 pRS313 EPO1::hphNT1 | This work |

Table S4. List of yeast strains used and created in this study (Continued)

| Strain  | Name                                                                              | Relevant genotype                                                                                              | Origin    |
|---------|-----------------------------------------------------------------------------------|----------------------------------------------------------------------------------------------------------------|-----------|
| YAD1325 | $P_{MET17}$ -Epo1 <sub>761-943</sub> -Cherry $P_{MET17}$ -GFP-Sec62 $\Delta$ epo1 | JD47, $P_{MET17}$ -EPO1 <sub>761-943</sub> -Cherry LEU2 pRS315 $P_{MET17}$ -GFP-SEC62 HIS3 pRS313 EPO1::hphNT1 | This work |
| YAD1282 | Hmg1-GFP                                                                          | JD47, URA3::HMG1-GFP URA3                                                                                      | This work |
| YAD1283 | Hmg1-GFP $\Delta$ epo1                                                            | JD47, URA3::HMG1-GFP URA3 EPO1::hphNT1                                                                         | This work |
| YAD1449 | Hmg1-GFP $\Delta$ scs2                                                            | JD47, URA3::HMG1-GFP URA3 SCS2::hphNT1                                                                         | This work |
| YAD1448 | Hmg1-GFP $\Delta$ ptc1                                                            | JD53, URA3::HMG1-GFP URA3 PTC1::kanMX6                                                                         | This work |
| YAD1547 | Hmg1-GFP $\Delta$ bem3                                                            | JD47, URA3::HMG1-GFP URA3 BEM3::hphNT1                                                                         | This work |
| YAD1545 | Hmg1-GFP $\Delta$ pea2                                                            | JD47, URA3::HMG1-GFP URA3 PEA2::hphNT1                                                                         | This work |
| YAD1546 | Hmg1-GFP $\Delta$ spa2                                                            | JD47, URA3::HMG1-GFP URA3 SPA2::hphNT1                                                                         | This work |
| YAD1805 | Hmg1-GFP $\Delta$ scs22                                                           | JD47, URA3::HMG1-GFP URA3 SCS22::hphNT1                                                                        | This work |
| YAD1770 | Hmg1-GFP $\Delta$ ylr031w                                                         | JD47, URA3::HMG1-GFP URA3 YLR031W::hphNT1                                                                      | This work |
| YAD1798 | Hmg1-GFP $\Delta$ bud6                                                            | JD47, URA3::HMG1-GFP URA3 BUD6::natNT2                                                                         | This work |
| YAD1797 | Hmg1-GFP $\Delta$ bni1                                                            | JD47, URA3::HMG1-GFP URA3 BNI1::natNT2                                                                         | This work |
| YAD1451 | Hmg1-GFP $\Delta$ epo1 $\Delta$ scs2                                              | URA3::HMG1-GFP URA3 EPO1::kanMX6 SCS2::hphNT1                                                                  | This work |
| YAD1453 | Hmg1-GFP $\Delta$ epo1 $\Delta$ ptc1                                              | URA3::HMG1-GFP URA3 PTC1::kanMX6 EPO1::hphNT1                                                                  | This work |
| YAD1548 | Hmg1-GFP $\Delta$ epo1 $\Delta$ pea2                                              | URA3::HMG1-GFP URA3 EPO1::kanMX6 PEA2::hphNT1                                                                  | This work |
| YAD1549 | Hmg1-GFP $\Delta$ epo1 $\Delta$ spa2                                              | URA3::HMG1-GFP URA3 EPO1::kanMX6 SPA2::hphNT1                                                                  | This work |
| YAD1551 | Hmg1-GFP $\Delta$ epo1 $\Delta$ bem3                                              | URA3::HMG1-GFP URA3 EPO1::kanMX6 BEM3::hphNT1                                                                  | This work |
| YAD1771 | Hmg1-GFP $\Delta$ epo1 $\Delta$ ylr031w                                           | URA3::HMG1-GFP URA3 EPO1::kanMX6 YLR031W::hphNT1                                                               | This work |
| YAD1800 | Hmg1-GFP $\Delta$ epo1 $\Delta$ bud6                                              | URA3::HMG1-GFP URA3 EPO1::hphNT1 BUD6::natNT2                                                                  | This work |
| YAD1799 | Hmg1-GFP $\Delta$ epo1 $\Delta$ bni1                                              | URA3::HMG1-GFP URA3 EPO1::natNT2 BNI1::hphNT1                                                                  | This work |
| YAD1550 | Hmg1-GFP $\Delta$ pea2 $\Delta$ bem3                                              | URA3::HMG1-GFP URA3 PEA2::kanMX6 BEM3::hphNT1                                                                  | This work |
| YAD512  | Kel1-MYC                                                                          | JD47, KEL1::KEL1-9xMYC TRP1                                                                                    | This work |

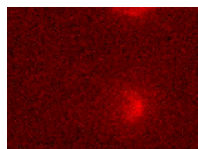

Video 1. **Time-lapse analysis of yeast cells coexpressing Spa2-Cherry with Epo1-GFP.** Cells were incubated at 30°C on SD complete. Frames were taken every 3 min for 120 min using a DeltaVision life cell imaging unit (Applied Precision). Selected stills are shown in Fig. 2 B.

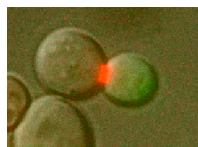

Video 2. **Time-lapse analysis of yeast cells coexpressing Shs1-Cherry with Spa2-GFP.** Cells were incubated at 30°C on SD complete. Frames were taken every minute for 85 min using a DeltaVision life cell imaging unit. Selected stills are shown in Fig. 2 C.

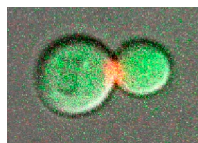

Video 3. **Time-lapse analysis of yeast cells coexpressing Shs1-Cherry with Epo1-GFP.** Cells were incubated at 30°C on SD complete. Frames were taken every minute for 65 min using a DeltaVision life cell imaging unit. Selected stills are shown in Fig. 2 C.

## References

- Bähler, J., J.Q. Wu, M.S. Longtine, N.G. Shah, A. McKenzie III, A.B. Steever, A. Wach, P. Philippsen, and J.R. Pringle. 1998. Heterologous modules for efficient and versatile PCR-based gene targeting in *Schizosaccharomyces pombe*. *Yeast*. 14:943–951. [http://dx.doi.org/10.1002/\(SICI\)1097-0061\(199807\)14:10<943::AID-YEA292>3.0.CO;2-Y](http://dx.doi.org/10.1002/(SICI)1097-0061(199807)14:10<943::AID-YEA292>3.0.CO;2-Y)
- Dohmen, R.J., R. Stappen, J.P. McGrath, H. Forrová, J. Kolarov, A. Goffeau, and A. Varshavsky. 1995. An essential yeast gene encoding a homolog of ubiquitin-activating enzyme. *J. Biol. Chem.* 270:18099–18109. <http://dx.doi.org/10.1074/jbc.270.30.18099>
- Dünkler, A., J. Müller, and N. Johnsson. 2012. Detecting protein-protein interactions with the Split-Ubiquitin sensor. *Methods Mol. Biol.* 786:115–130. [http://dx.doi.org/10.1007/978-1-61779-292-2\\_7](http://dx.doi.org/10.1007/978-1-61779-292-2_7)
- Hruby, A., M. Zapatka, S. Heucke, L. Rieger, Y. Wu, U. Nussbaumer, S. Timmermann, A. Dünkler, and N. Johnsson. 2011. A constraint network of interactions: protein-protein interaction analysis of the yeast type II phosphatase Ptc1p and its adaptor protein Nbp2p. *J. Cell Sci.* 124:35–46. <http://dx.doi.org/10.1242/jcs.077065>
- Iffland, A., P. Tafelmeyer, C. Saudan, and K. Johnsson. 2000. Directed molecular evolution of cytochrome c peroxidase. *Biochemistry.* 39:10790–10798. <http://dx.doi.org/10.1021/bi001121e>
- Janke, C., M.M. Magiera, N. Rathfelder, C. Taxis, S. Reber, H. Maekawa, A. Moreno-Borchart, G. Doenges, E. Schwob, E. Schiebel, and M. Knop. 2004. A versatile toolbox for PCR-based tagging of yeast genes: new fluorescent proteins, more markers and promoter substitution cassettes. *Yeast*. 21:947–962. <http://dx.doi.org/10.1002/yea.1142>
- Schaub, Y., A. Dünkler, A. Walther, and J. Wendland. 2006. New pFA-cassettes for PCR-based gene manipulation in *Candida albicans*. *J. Basic Microbiol.* 46:416–429. <http://dx.doi.org/10.1002/jobm.200510133>
- Schneider, C., J. Grois, C. Renz, T. Gronemeyer, and N. Johnsson. 2013. Septin rings act as a template for myosin higher-order structures and inhibit redundant polarity establishment. *J. Cell Sci.* 126:3390–3400. <http://dx.doi.org/10.1242/jcs.125302>
- Wilhovsky, S., R. Gardner, and R. Hampton. 2000. HRD gene dependence of endoplasmic reticulum-associated degradation. *Mol. Biol. Cell.* 11:1697–1708. <http://dx.doi.org/10.1091/mbc.11.5.1697>
